# Supplementary material for: Biomolecule-mediated CdS-TiO2-reduced graphene oxide ternary nanocomposites for efficient visible light-driven photocatalysis
Source: Royal Society of Chemistry journal article supplement (doi:10.1039/c4dt02749c), 2014-10-17
Supplement: c4dt02749c1.pdf [file c4dt02749c1.pdf]

## Electronic Supplementary Information

### **Biomolecule-mediated CdS-TiO<sub>2</sub>-reduced graphene oxide ternary nanocomposites for efficient visible light driven photocatalysis**

Soumen Dutta,<sup>a</sup> Ramakrishna Sahoo,<sup>a</sup> Chaiti Ray,<sup>a</sup> Sougata Sarkar,<sup>a</sup> Jayasmita Jana,<sup>a</sup> Yuichi  
Negishi,<sup>b</sup> and Tarasankar Pal<sup>a</sup> \*

<sup>a</sup>Department of Chemistry, Indian Institute of Technology, Kharagpur – 721302, India

<sup>b</sup>Department of Applied Chemistry, Tokyo University of Science, Tokyo-1628601, Japan

E-mail: [tpal@chem.iitkgp.ernet.in](mailto:tpal@chem.iitkgp.ernet.in)

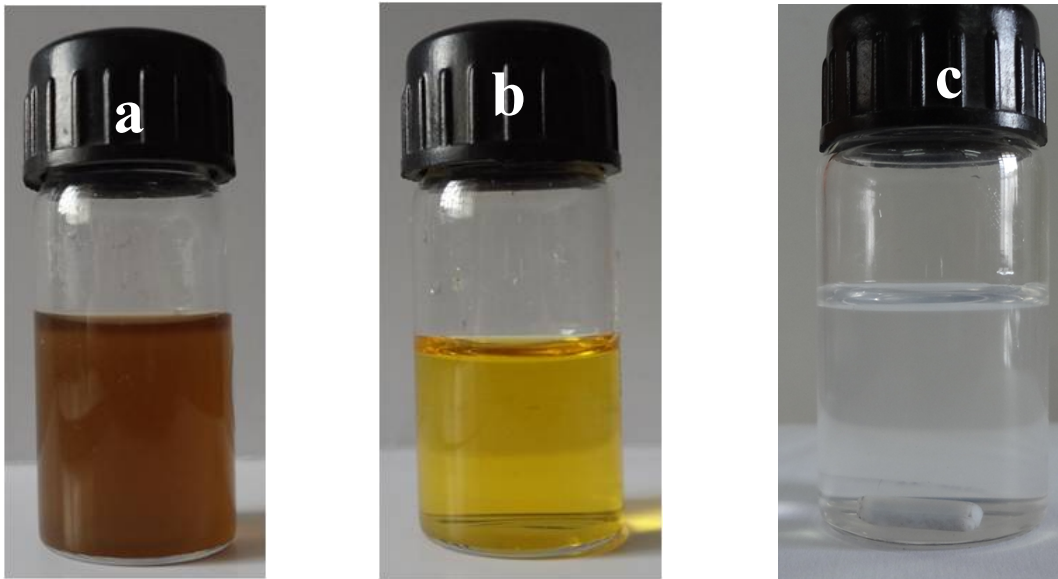

Fig. S1 Digital images of (a) aqueous GO dispersion and (b) solution of titanium peroxy compound (c) solution of titanium peroxy compound after pH adjusted to 5.0.

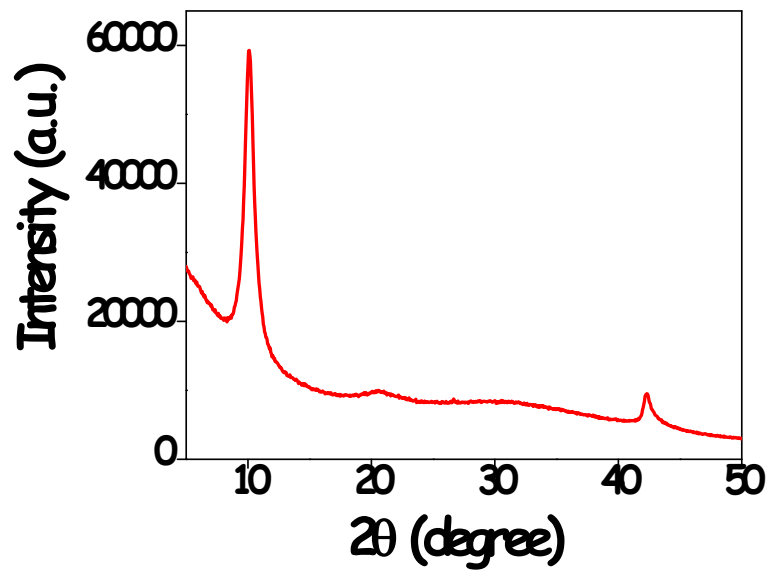

Fig. S2 XRD pattern of GO.

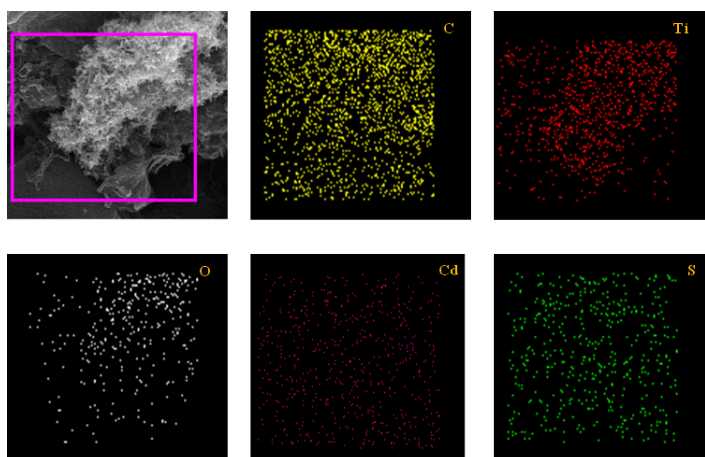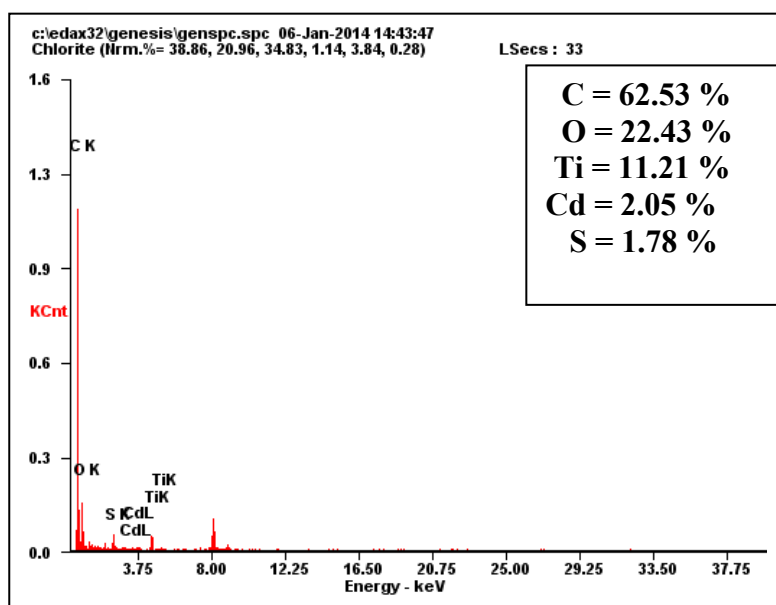

**Fig. S3** Elemental mapping and EDAX spectra of red CdS-TiO<sub>2</sub>-rGO nanocomposites.

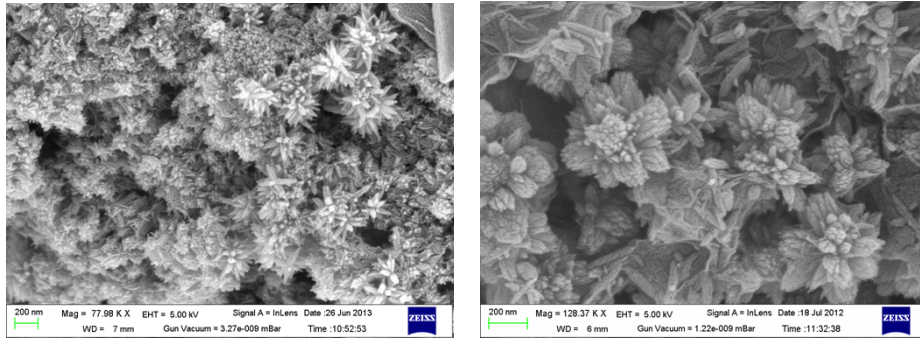

**Fig. S4** FESEM images of flowerly  $\text{TiO}_2$  nanostructures attached to rGO sheets in different magnification.

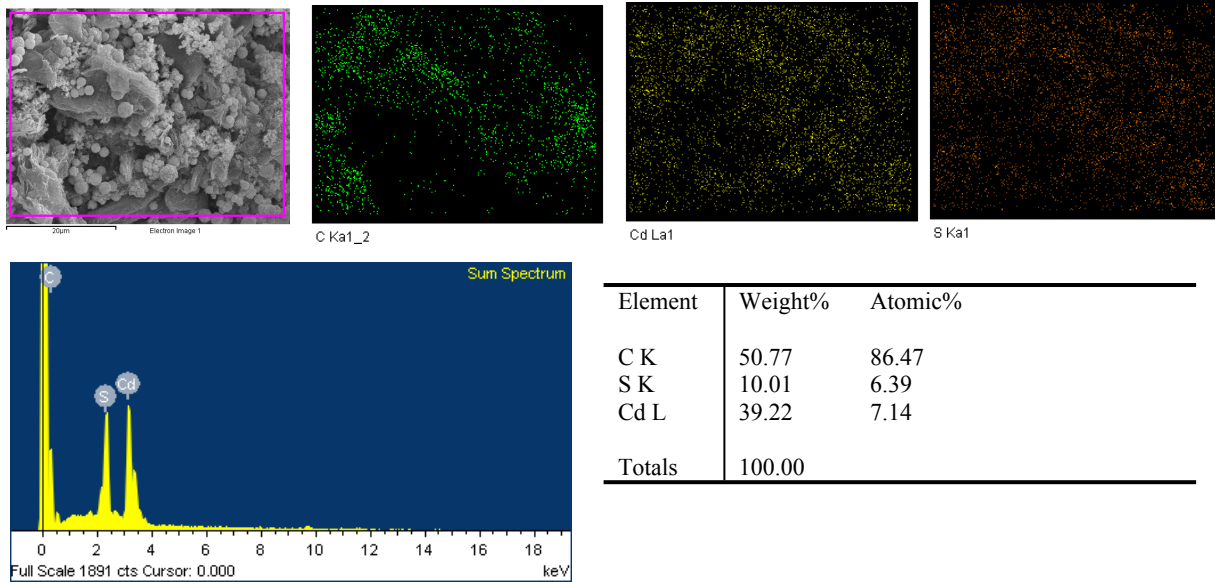

**Fig. S5** EDAX and elemental mapping analysis of CdS-rGO nanocomposites.

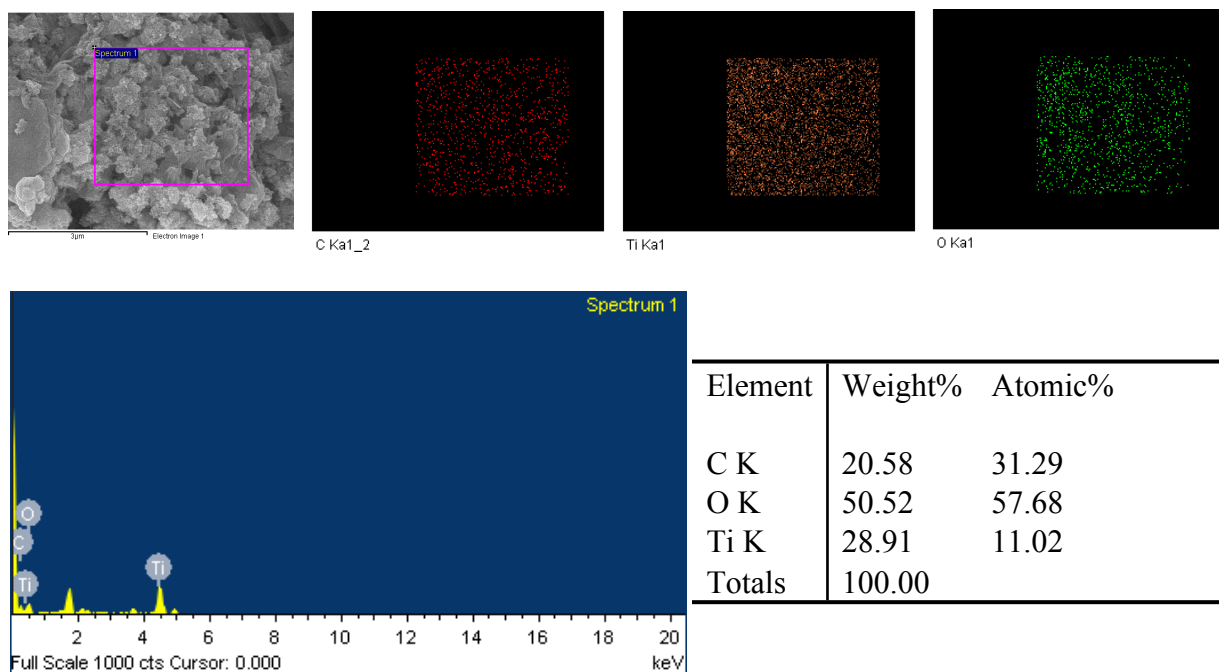

**Fig. S6** Elemental mapping and EDAX analysis of TiO<sub>2</sub>-rGO nanocomposites.

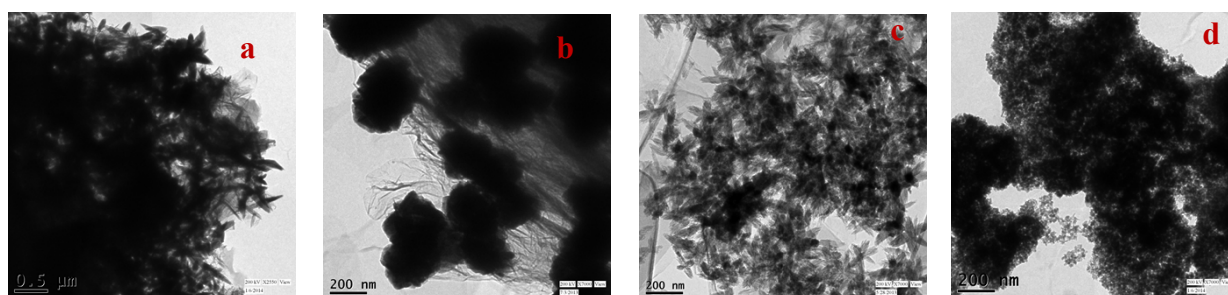

**Fig. S7** TEM images of (a) RCTG, (b) CG, (c) TG, and (d) CT.

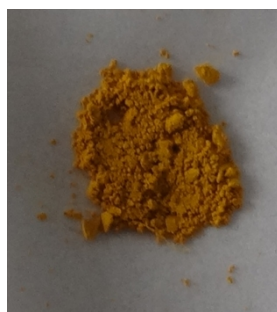

Fig. S8 Digital images of CdS-TiO<sub>2</sub> nanocomposite.

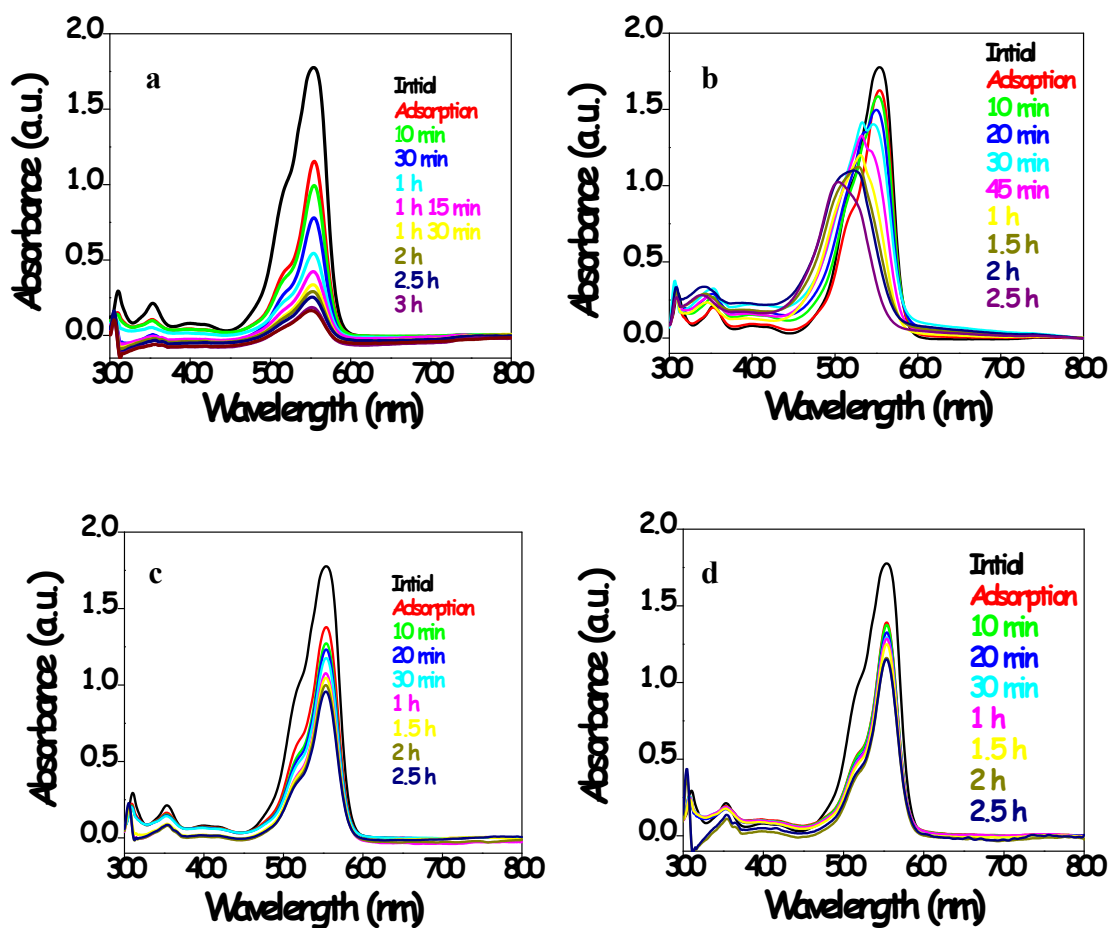

Fig. S9 Rhodamine B degradation under visible light irradiation in presence of (a) CG, (b) CT, (c) RCTG, and (d) TG.

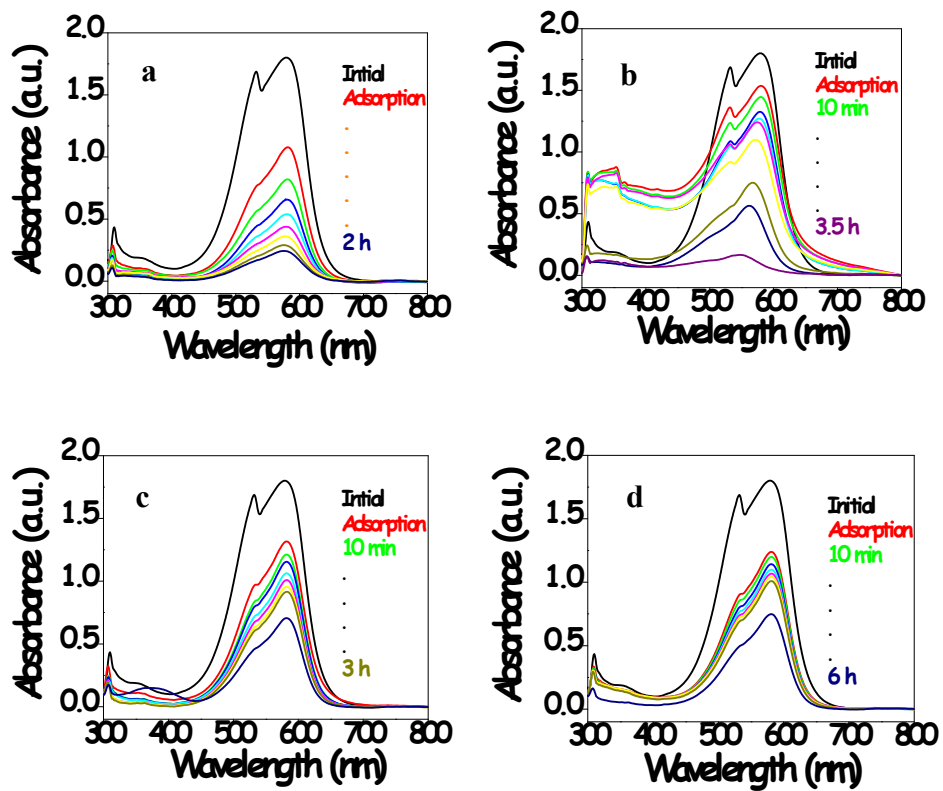

Fig. S10 Crystal violet degradation under visible light irradiation in presence of (a) CG, (b) CT, (c) RCTG, and (d) TG.

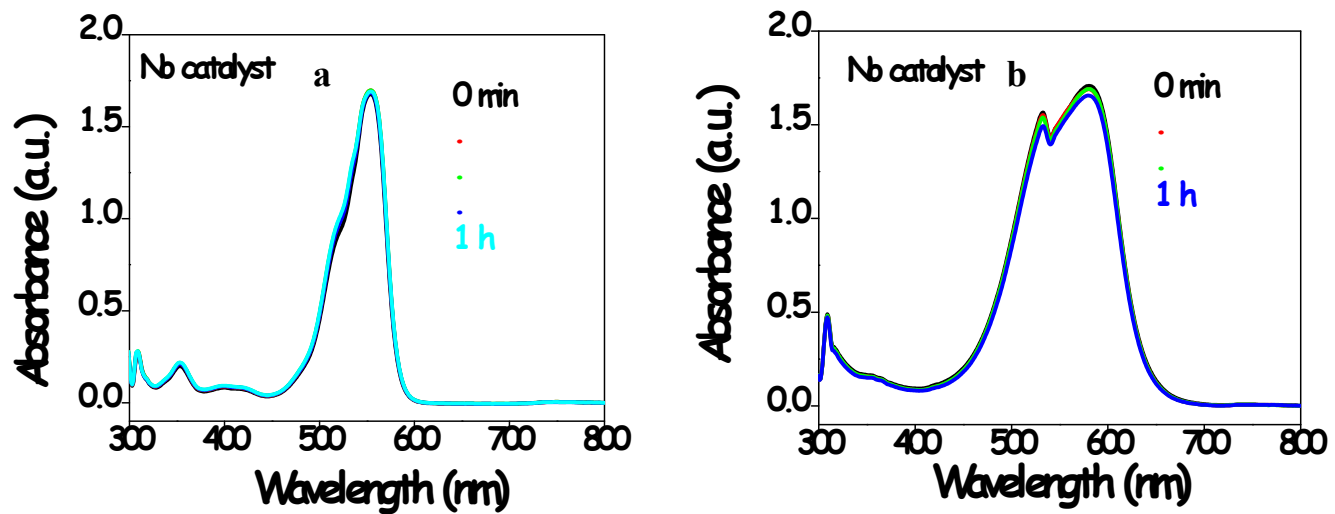

Fig. S11 (a) Rhodamine B and (b) crystal violet degradation under visible light irradiation in absence of any catalyst.



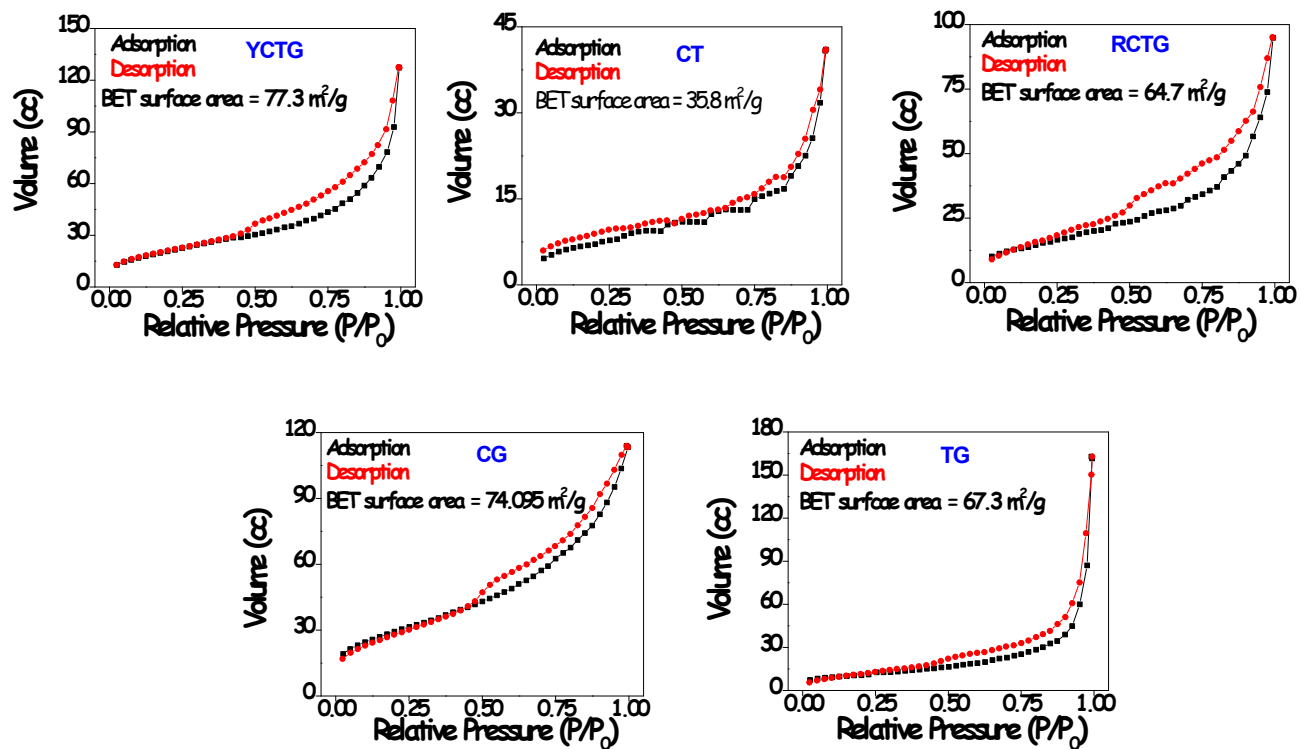

Fig. S12  $N_2$  adsorption-desorption isotherm for various photocatalysts.

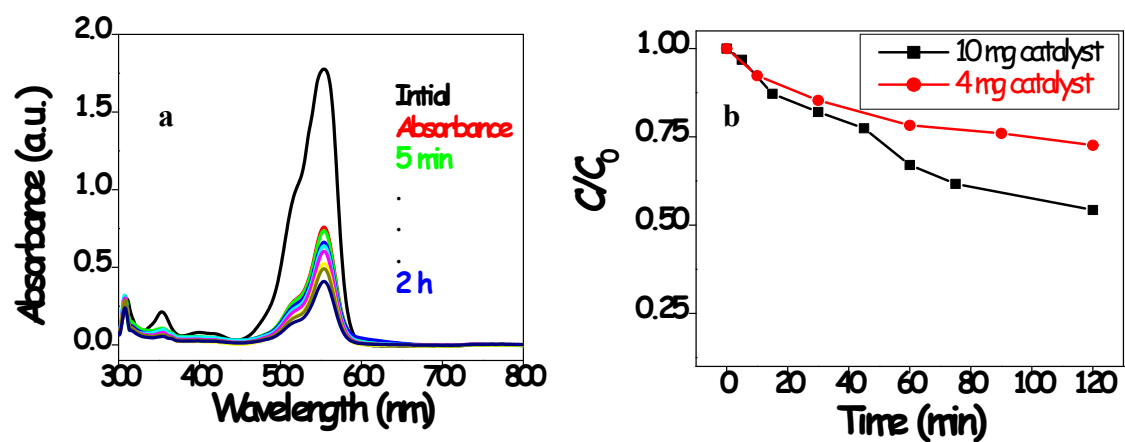

Fig. S13 (a) Rhodamine B degradation under visible light irradiation in presence of 10 mg of RCTG. The catalyst amount is 2.5 times higher than normal RB degradation case. (b) Comparison in dye degradation efficiencies with varying RCTG amount.
